# Supplementary material for: A Mouse-Adapted SARS-Coronavirus Causes Disease and Mortality in BALB/c Mice
Source: PLOS journal article supplement (doi:10.1371/journal.ppat.0030005), 2007-01-01
Supplement: S2 (10.1371/journal.ppat.0030005.s002) [file journal.ppat.0030005.s002]

### Table S2. Polymerase chain reaction thermal profiles

| PCR profile | # Cycles | Thermal profile |
| --- | --- | --- |
| Denaturation Annealing Extension |
| 1 | 1 | 94C, 2min   c |
| 2 | 94C, 45sec 60C, 1min 72C, 1min 20sec |
| 2 | “ 58C, 1min “ |
| 2 | “ 56C, 1min “ |
| 2 | “ 54C, 1min “ |
| 2 | “ 52C, 1min “ |
| 25 | “ 50C, 1min “ |
| 1 | 72C, 1min 20sec |
|  |  |  |
| 2 | 1 | 94C, 1min   c |
| 2 | 94C, 45sec 65C, 1min 72C, 1min 20sec |
| 2 | “ 63C, 1min “ |
| 2 | “ 61C, 1min “ |
| 2 | “ 59C, 1min “ |
| 2 | “ 57C, 1min “ |
| 25 | “ 55C, 1min “ |
| 1 | 72C, 2min |
|  |  |  |
| 3 | 1 | 92C, 2min   c |
| 4 | 94C, 45sec 60C, 1min 72C, 3min 30sec |
| 4 | “ 58C, 1min “ |
| 4 | “ 56C, 1min “ |
| 19 | “ 54C, 1min “ |
| 1 | 72C, 7min |
